# Supplementary material for: Peppermint essential oil inhibits Drosophila suzukii emergence but reduces Pachycrepoideus vindemmiae parasitism rates
Source: PubMed Central journal article supplement (PMC7272437; doi:10.1038/s41598-020-65189-5), 2020-06-04
Supplement: 41598_2020_65189_MOESM1_ESM.pdf [file 41598_2020_65189_MOESM1_ESM.pdf]

Peppermint essential oil inhibits *Drosophila suzukii* emergence but reduces *Pachycrepoideus vindemmiae* parasitism rates

Chelsea Megan Gowton,<sup>1\*</sup> Michał Reut<sup>1,2</sup> and Juli Carrillo<sup>1</sup>

1 Faculty of Land and Food Systems, Centre for Sustainable Food Systems, Biodiversity Research Centre, The University of British Columbia, Unceded x<sup>w</sup>məθk<sup>w</sup>əyəm (Musqueam) Territory, Vancouver, V6T 1Z4 British Columbia, Canada.

2 Department of Applied Entomology, Faculty of Horticulture and Landscape Architecture, Warsaw University of Life Sciences – SGGW, Nowoursynowska 159, 02-776 Warsaw, Poland

\*Corresponding author: [cgowton@mail.ubc.ca](mailto:cgowton@mail.ubc.ca)

ORCID:

Chelsea Megan Gowton: 0000-0003-2443-0809

Michał Reut: 0000-0002-9259-7830

## Supplementary Materials

### *Essential Oil GC-MS methodology*

We prepared our headspace sample by placing one  $\mu\text{L}$  of undiluted peppermint essential oil in a 10.0 ml headspace vial and incubated the sample for 10 min at  $30^\circ\text{C}$ . A volume of 500  $\mu\text{l}$  of headspace sample was injected into an Agilent 6890N/5973 Gas Chromatograph Mass Spectrometer system.

The GC initial oven program temperature was  $40^\circ\text{C}$ , held for 3 minutes, then ramped to  $100^\circ\text{C}$  at  $10^\circ\text{C}/\text{minute}$ , then ramped to  $130^\circ\text{C}$  at  $3^\circ\text{C}/\text{min}$ , and finally ramped to a final temperature of  $250^\circ\text{C}$  at  $30^\circ\text{C}/\text{min}$  and hold for 12 minutes. The total run time was 35 min. The injection was done in split mode with a ratio of 5:1. The column used was an Agilent DB-Wax column (P/N 122-7062) with a dimension of 60 m x 0.25 mm id and 0.25  $\mu\text{m}$  film thickness. The carrier gas was Helium and set at a flow rate of 1.9 mL/min. The mass spectrometry analysis was run in electron ionization mode at 70eV with a mass scan range of 35-500. Mass spectra were match against Wiley 09/NIST 08 libraries.

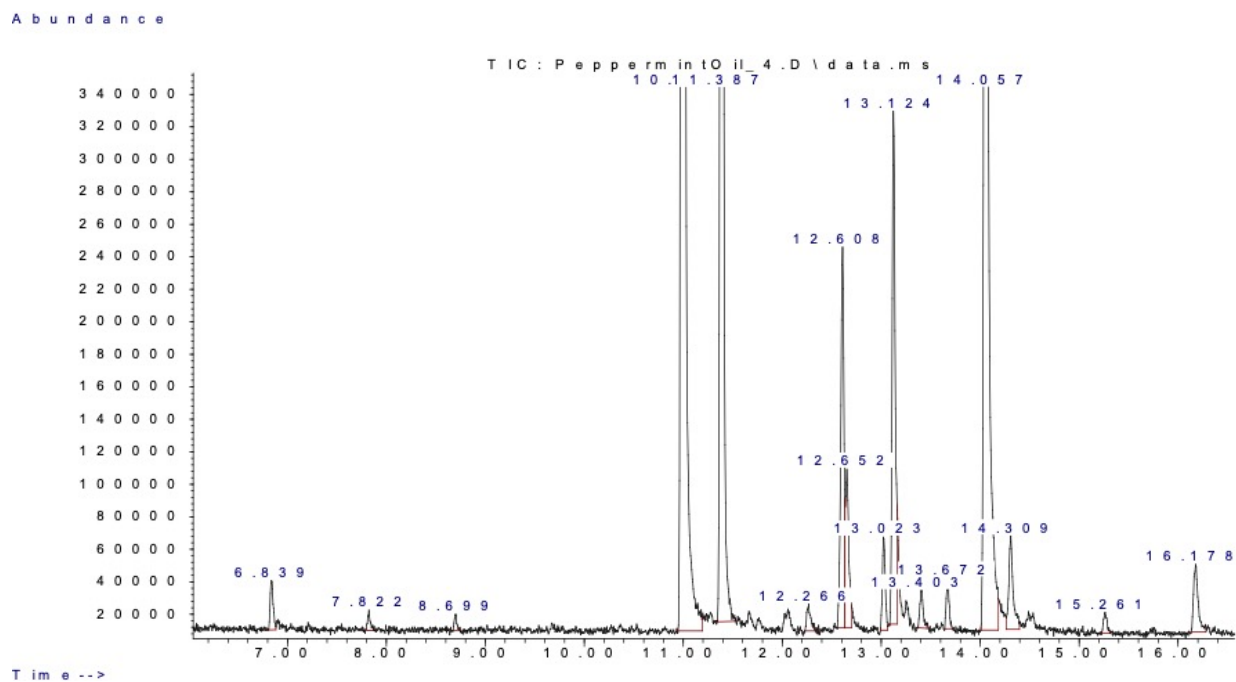

**Supplementary Figure 1:** The representative chromatogram of headspace volatiles from a commercially available peppermint essential oil. Compound identification numbers correspond to retention times listed in Table 1.
